# Supplementary material for: Variations in genetic diversity in cultivated Pistacia chinensis
Source: Front Plant Sci. 2022 Nov 10;13:1030647. doi: 10.3389/fpls.2022.1030647 (PMC9691265; doi:10.3389/fpls.2022.1030647)
Supplement: Supplementary Table 1 — The haplotypes of 39 Pistacia chinensis samples. [file Table_1.xlsx]

## Sheet: Sheet1
Samples	Voucher	Haplotypes
Beijing	BJTZS	Hap_1
Gansu	202109ZPF0133	Hap_1
Guizhou01	BJFC 00076565	Hap_1
Hebei01	202009zlj069	Hap_1
Hebei02	202009zlj070	Hap_1
Henan01	BJFC 00081493	Hap_1
Jiangsu01	BJFC 00100722	Hap_1
Jiangsu02	202009bzg003	Hap_1
Jiangsu03	202009bzg020	Hap_1
Jiangsu05	202009bzg154	Hap_1
Shandong01	201909wfs049	Hap_1
Shandong03	201910lw012	Hap_1
Shandong05	201910lw016	Hap_1
Shandong06	201910lw017	Hap_1
Shandong07	201910lw005	Hap_1
Shandong09	202009gxj042	Hap_1
Shanxi01	202009wl165	Hap_1
Shanxi02	202110040028	Hap_1
Shanxi03	202110170077	Hap_1
Shanxi05	202110040075	Hap_1
Shanxi07	202109WL0099	Hap_1
Shanxi10	202009wl251	Hap_1
Zhengjiang	202110110137	Hap_1
Shandong04	201910lw014	Hap_2
Anhui	BJFC 00021725	Hap_3
Shanxi04	202110040060	Hap_4
Shanxi06	202109WL0154	Hap_4
Shanxi08	202109WL0093	Hap_4
Shanxi09	202109WL0064	Hap_4
Shandong02	201910lq011	Hap_5
Shandong08	202009hb040	Hap_5
Henan02	BJFC 00081484	Hap_6
Henan03	BJFC 00079805	Hap_6
Henan04	BJFC 00085509	Hap_7
Jiangsu04	202009bzg083	Hap_8
Jiangxi	BJFC 00021716	Hap_9
Yunnan01	BJFC 00021739	Hap_10
Guangxi	BJFC 00021710	Hap_11
Guizhou02	BJFC 00078597	Hap_12
